# Supplementary material for: Development and validation of a label-free colorimetric aptasensor based on the HCR and hemin/G-quadruplex DNAzyme for the determination of patulin in fruits and fruit-based products from Xinjiang (China)
Source: Royal Society of Chemistry journal article supplement (doi:10.1039/d2ay00908k), 2022-01-01
Supplement: d2ay00908k1.pdf [file d2ay00908k1.pdf]

1

## Supporting information

2 **Development and validation of a label-free colorimetric aptasensor based on HCR**  
3 **and hemin/G-quadruplex DNAzyme for the determination of patulin in fruit and**  
4 **fruit-based products from Xinjiang (China)**

5 Chunxia Lu<sup>a</sup>, Xia Chen<sup>b\*</sup>, Yong Ji<sup>b</sup>, Chengjiang Liu<sup>c</sup>, Changbin Liu<sup>d\*</sup>

6 a. Life Science and Technology Institute, Yangtze Normal University, Chongqing  
7 408100, China

8 b. Supervision and Testing Center Food Quality, Ministry of Agriculture and Rural  
9 Affairs (Shihezi), Xinjiang Academy of Agriculture and Reclamation Science, Shihezi  
10 832000, China

11 c. Institute of Agricultural Products Processing , Xinjiang Academy of Agriculture and  
12 Reclamation Science, Shihezi 832000, China

13 d. Institute of Animal Husbandry and Veterinary Science, Xinjiang Academy of  
14 Agriculture and Reclamation Science, Shihezi 832000, China

15 Corresponding Author

16 \* Xia Chen, E-mail: [celia20081222@163.com](mailto:celia20081222@163.com)

17 \* Changbin Liu, E-mail: [xlchangbin@163.com](mailto:xlchangbin@163.com)

18

19 Fig. S1 The effect of the concentration of detection probe (a), incubation time between  
 20 PAT and aptamer (b), H1/H2 concentration (c), reaction time of HCR (d), hemin  
 21 concentration (e), incubation time of hemin and G-quadruplex (f) on the performance of  
 22 the aptasensor. Different letters indicate significant differences ( $P < 0.05$ ), same letters  
 23 indicate no significant differences ( $P > 0.05$ ).

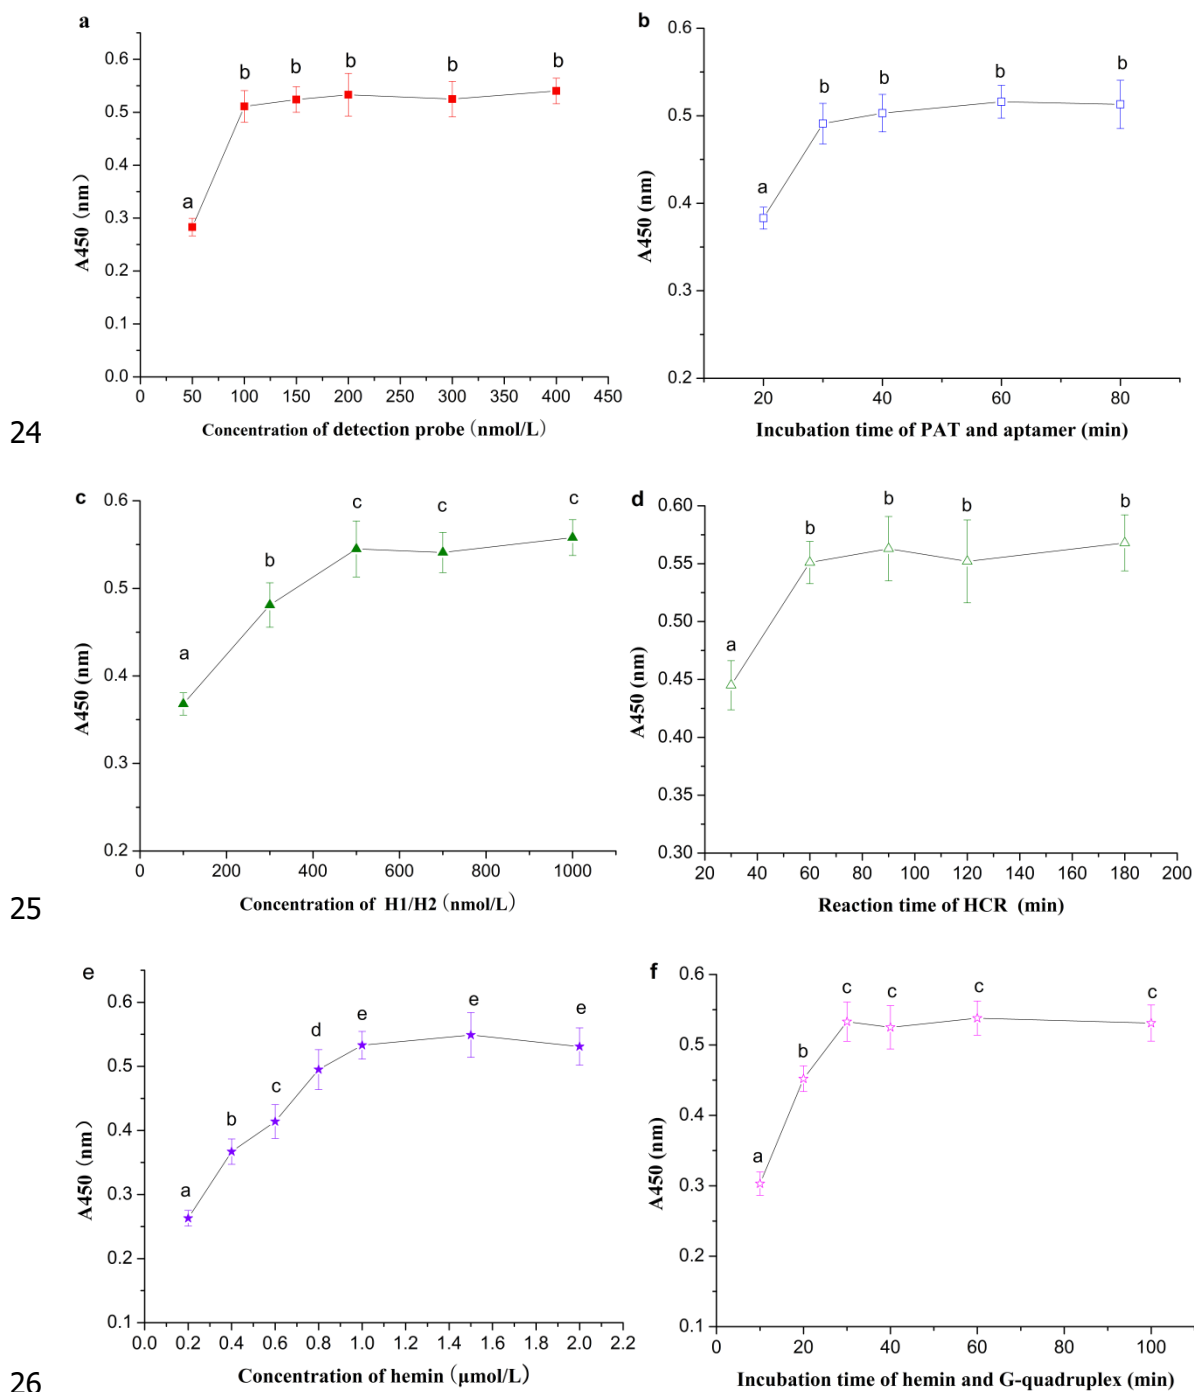

26

27
